# Supplementary material for: QTL Mapping and Identification of Candidate Genes for Heat Tolerance at the Flowering Stage in Rice
Source: Front Genet. 2021 Jan 22;11:621871. doi: 10.3389/fgene.2020.621871 (PMC7862774; doi:10.3389/fgene.2020.621871)
Supplement: Supplementary file 4 [file Table_3.XLSX]

## Sheet: Supplementary Table 3
Table S3. List of putative genes in RGAP database containing the qHTT8.
No.	Gene name	Start	End	Description
1	LOC_Os08g06420	3596347	3601698	abhydrolase domain-containing protein FAM108C1, putative, expressed
2	LOC_Os08g06430	3613350	3615878	mitochondrial NADH-ubiquinone oxidoreductase, putative, expressed
3	LOC_Os08g06440	3616624	3618819	secretory carrier-associated membrane protein 5, putative, expressed
4	LOC_Os08g06450	3619442	3621580	cytidylyltransferase domain containing protein, expressed
5	LOC_Os08g06460	3622704	3624999	dnaJ domain containing protein, expressed
6	LOC_Os08g06470	3630958	3635521	transmembrane 9 superfamily member, putative, expressed
7	LOC_Os08g06474	3636267	3638026	ribosomal protein L13, putative, expressed
8	LOC_Os08g06480	3667092	3675813	lissencephaly type-1-like homology motif, putative, expressed
9	LOC_Os08g06490	3677031	3680201	pentatricopeptide, putative, expressed
10	LOC_Os08g06500	3680925	3688728	PPR repeat domain containing protein, putative, expressed
11	LOC_Os08g06510	3686054	3688009	zinc finger, C3HC4 type domain containing protein, expressed
12	LOC_Os08g06530	3694282	3696648	rubredoxin family protein, putative, expressed
13	LOC_Os08g06550	3698312	3700553	acyl CoA binding protein, putative, expressed
14	LOC_Os08g06560	3702643	3704257	ribosomal protein L13, putative, expressed
15	LOC_Os08g06600	3722365	3726246	nuf2 family protein, expressed
16	LOC_Os08g06610	3726902	3727461	mps one binder kinase activator-like 1A, putative, expressed
17	LOC_Os08g06620	3728097	3728844	DNA polymerase delta subunit 4 family, putative, expressed
18	LOC_Os08g06630	3732441	3736521	RNA polymerase sigma factor, putative, expressed
19	LOC_Os08g06640	3740161	3745426	stress-induced protein, putative, expressed
20	LOC_Os08g06710	3763274	3764796	OsFBDUF42 - F-box and DUF domain containing protein, expressed
21	LOC_Os08g06780	3785863	3787112	OsFBDUF43 - F-box and DUF domain containing protein, expressed
22	LOC_Os08g07010	3928462	3933577	ABC-2 type transporter domain containing protein, expressed
23	LOC_Os08g07040	3944796	3941121	plant protein of unknown function domain containing protein, expressed
24	LOC_Os08g07050	3946485	3945931	pentatricopeptide, putative, expressed
25	LOC_Os08g07060	3949017	3951136	CRR6, putative, expressed
26	LOC_Os08g07080	3960463	3965666	terpene synthase, putative, expressed
27	LOC_Os08g07100	3972216	3977334	terpene synthase, putative, expressed
28	LOC_Os08g07120	3985667	3988792	terpene synthase, putative, expressed
29	LOC_Os08g07170	4011371	4013275	cytokinin-O-glucosyltransferase 2, putative, expressed
30	LOC_Os08g07180	4014115	4014648	cytokinin-O-glucosyltransferase 2, putative, expressed
31	LOC_Os08g07200	4017920	4020079	UDP-glucoronosyl/UDP-glucosyl transferase, putative, expressed
32	LOC_Os08g07260	4053153	4054635	O-methyltransferase, putative, expressed
33	LOC_Os08g07270	4059111	4057594	glycosyltransferase, putative, expressed
34	LOC_Os08g07290	4077663	4069808	HEAT repeat family protein, putative, expressed
35	LOC_Os08g07300	4078665	4080984	haloacid dehalogenase-like hydrolase domain-containing protein 3, putative, expressed
36	LOC_Os08g07330	4105398	4109958	RGH1A, putative, expressed
37	LOC_Os08g07340	4111868	4115417	mla1, putative, expressed
38	LOC_Os08g07370	4128755	4127068	RGH1A, putative, expressed
39	LOC_Os08g07390	4149998	4147048	mla1, putative, expressed
40	LOC_Os08g07400	4157251	4153343	cullin, putative, expressed
41	LOC_Os08g07440	4178549	4175872	AP2 domain containing protein, expressed
42	LOC_Os08g07450	4180539	4179589	glutaredoxin protein, putative, expressed
43	LOC_Os08g07480	4200965	4191605	DNA-directed RNA polymerase subunit, putative, expressed
44	LOC_Os08g07500	4212914	4211443	DUF617 domain containing protein, expressed
45	LOC_Os08g07540	4237010	4242585	hemimethylated DNA binding domain containing protein, expressed
46	LOC_Os08g07550	4242935	4243883	hAT dimerisation domain-containing protein, putative, expressed
47	LOC_Os08g07700	4304696	4303902	AP2 domain containing protein, expressed
48	LOC_Os08g07720	4318638	4316160	transferase family protein, putative, expressed
49	LOC_Os08g07730	4325887	4329768	transferase family protein, putative, expressed
50	LOC_Os08g07740	4335434	4333717	histone-like transcription factor and archaeal histone, putative, expressed
51	LOC_Os08g07760	4344171	4350502	BRASSINOSTEROID INSENSITIVE 1-associated receptor kinase 1 precursor, putative, expressed
52	LOC_Os08g07774	4352807	4361458	disease resistance protein RPM1, putative, expressed
53	LOC_Os08g07790	4363355	4365519	CRS2-associated factor 2, mitochondrial precursor, putative, expressed
54	LOC_Os08g07810	4371022	4372930	strictosidine synthase, putative, expressed
55	LOC_Os08g07830	4389031	4385768	DUF292 domain containing protein, expressed
56	LOC_Os08g07840	4400757	4390729	PolI-like DNA polymerase, putative, expressed
57	LOC_Os08g07850	4416924	4407120	PolI-like DNA polymerase, putative, expressed
58	LOC_Os08g07880	4430196	4434313	phosphopantothenate--cysteine ligase, putative, expressed
59	LOC_Os08g07890	4440181	4448191	NB-ARC domain containing protein, expressed
60	LOC_Os08g07920	4462149	4464256	disease resistance protein RPM1, putative, expressed
61	LOC_Os08g07930	4466029	4471773	resistance protein, putative, expressed
62	LOC_Os08g07940	4474830	4485343	disease resistance protein RPM1, putative, expressed
63	LOC_Os08g07950	4487727	4495598	NB-ARC domain containing protein, expressed
64	LOC_Os08g07960	4502242	4496679	mitotic checkpoint protein, putative, expressed
65	LOC_Os08g07970	4508263	4505738	transcription factor, putative, expressed
